# Supplementary material for: Extracellular Vesicles Derived from Primed Mesenchymal Stromal Cells Loaded on Biphasic Calcium Phosphate Biomaterial Exhibit Enhanced Macrophage Polarization
Source: MDPI journal article supplement (doi:10.3390/cells11030470), 2022-01-29
Supplement: s1 [file s1]

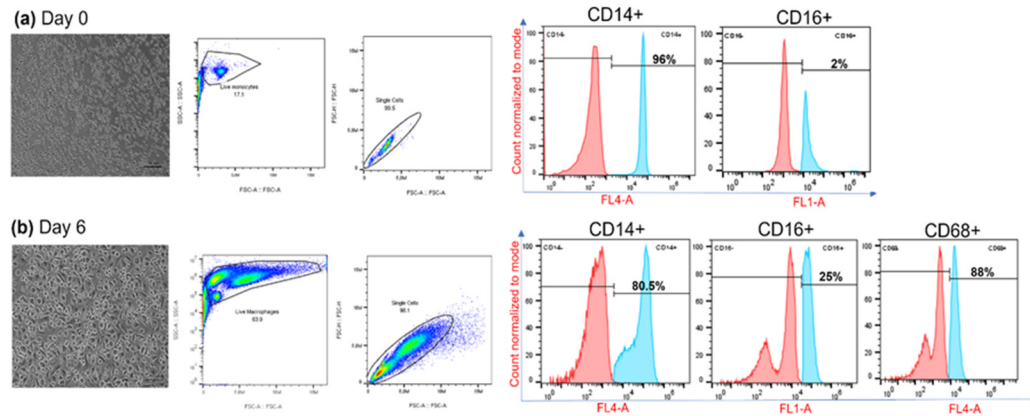

**Figure S1.** Generation of macrophages from CD14<sup>+</sup> CD16<sup>-</sup> peripheral blood-derived monocytes: **(a)** freshly isolated monocytes showed 96% CD14<sup>+</sup> and 2% CD16<sup>+</sup> expression; **(b)** after 6 days of culture with MCSF, adherent macrophages showed around 80% CD14, 25% CD16, and additionally, 88% CD68 expression, which confirms their differentiation to M0 (naïve) state.
